# Supplementary material
Source: HighWire-hosted journal article supplement (https://www.cmajopen.ca/highwire/filestream/81088/field_highwire_adjunct_files/0/2018-0009-1-at.pdf)
Supplement: 2018-0009-1-at.pdf [file 2018-0009-1-at.pdf]

## Appendix 1: Supplementary tables

| <b>Supplementary Table 1: Alberta Health Services Urban Continuum Area Definition</b> |                                                                                                                                                                                                                      |
|---------------------------------------------------------------------------------------|----------------------------------------------------------------------------------------------------------------------------------------------------------------------------------------------------------------------|
| <b>Main Delivery Site</b>                                                             | <b>Description</b>                                                                                                                                                                                                   |
| Urban                                                                                 | 5 major urban centres with populations > 25,000 but less and 500,000 (Grand Prairie, Fort McMurray, Red Deer, Lethbridge, Medicine Hat)                                                                              |
| Moderate Urban                                                                        | Local Geographic areas surrounding the 5 urban centres. These areas are typically considered rural given that their populations are low and the Local Geographic areas do not define these areas properly            |
| Metro                                                                                 | Population greater than 500,000. Calgary and Edmonton proper                                                                                                                                                         |
| Moderate Metro                                                                        | Defined by AHS Local Geography areas immediately surrounding Calgary and Edmonton. These are deemed as commuter communities (live outside of Calgary/Edmonton but commute to Calgary/Edmonton for work and business) |
| Rural Centre Area                                                                     | Population of 10,000 to less than 25,000 population (Brooks, Canmore, Wetaskiwin, Camrose, Lloydminster, Cold Lake)                                                                                                  |
| Rural                                                                                 | Populations less than 10,000 and up to 200 kilometres from a Metro or Urban centre. These include towns, villages, hamlets, and agricultural areas                                                                   |
| Rural Remote                                                                          | Greater than 200 kilometres from a Metro or Urban centre. Industries tend to include oil & gas, forestry, hunting/trapping, tourism and sometimes pockets of agriculture                                             |

(Alberta Health Services and Alberta Health (2017), Official Standard Geographic Areas, Alberta, Canada).

| <b>Supplementary Table 2: Percent of service code use by non-high volume and high volume providers</b> |              |                  |                        |                  |                    |                  |
|--------------------------------------------------------------------------------------------------------|--------------|------------------|------------------------|------------------|--------------------|------------------|
| <b>Code</b>                                                                                            | <b>Total</b> |                  | <b>Non-High Volume</b> |                  | <b>High Volume</b> |                  |
|                                                                                                        | <u>Obs.</u>  | <u>Mean (SD)</u> | <u>Obs.</u>            | <u>Mean (SD)</u> | <u>Obs.</u>        | <u>Mean (SD)</u> |
| Limited Visit Fee (03.03A)                                                                             | 3465         | 51.8 (27.9)      | 3239                   | 51.4(27.7)       | 226                | 57.3 (29.1)      |
| Comprehensive Visit Fee (03.04A)                                                                       | 3465         | 5.4 (6.0)        | 3239                   | 5.3(6.0)         | 226                | 4.8(5.7)         |
| Complex Care Visit Fee* (03.04J)                                                                       | 3465         | 0.4 (1.1)        | 3239                   | 0.4(1.1)         | 226                | *0.7 (1.3)       |
| After-Hours Call-Back (03.03MD)                                                                        | 3465         | 0.1              | 3239                   | 0.1              | 226                | 0.14             |
| After-Hours Call-Back (03.03MC)                                                                        | 3465         | 0.07             | 3239                   | 0.07             | 226                | 0.08             |
| After Hours Fee* (03.01AA)                                                                             | 3465         | 6.6 (10.9)       | 3239                   | 6.7(11.0)        | 226                | *5.2 (9.3)       |
| Mental Health Visit Fee (08.19G)                                                                       | 3465         | 1.2(2.9)         | 3239                   | 1.22(2.8)        | 226                | 0.6 (1.3)        |
| Hospital Admission 03.04C                                                                              | 3465         | 0.4(1.1)         | 3239                   | 0.4 (1.1)        | 226                | 0.4 (0.8)        |
| Pap Smear (13.99BA)                                                                                    | 3465         | 1.3 (2.9)        | 3239                   | 1.3(2.9)         | 226                | 0.8 (2.0)        |
| Time Modifier1 CMPG01*                                                                                 | 3465         | 17.1 (15.1)      | 3239                   | 17.7 (15.2)      | 226                | *9.4 (11.4)      |
| Time Modifier2 CMPG02*                                                                                 | 3465         | 5.2 (7.0)        | 3239                   | 5.5 (7.1)        | 226                | *1.7 (3.7)       |

*Note: \* Denotes statistically significant difference (at p=0.05) between high and low volume when adjusting for covariates.*
